# Supplementary material for: The formation of the light-sensing compartment of cone photoreceptors coincides with a transcriptional switch
Source: eLife journal article supplement (doi:10.7554/elife.31437), 2017-11-06
Supplement: supp [file elife-31437-supp-v1.zip]

Archive with 8 entries (8 files):
- elife_poa_e31437_Figure_1_figure_supplement_2.pdf
- elife_poa_e31437_Figure_2_figure_supplement_1.pdf
- elife_poa_e31437_Figure_1_figure_supplement_1.pdf
- elife_poa_e31437_Supplementary_File_1.docx
- elife_poa_e31437_Figure_2_figure_supplement_2.pdf
- elife_poa_e31437_Figure_4_figure_supplement_1.pdf
- elife_poa_e31437_Figure_3_figure_supplement_1.pdf
- elife_poa_e31437_Transparent_Reporting_File.docx
