# Supplementary figures and images for: The formation of the light-sensing compartment of cone photoreceptors coincides with a transcriptional switch
Source: eLife journal article supplement (doi:10.7554/elife.31437), 2017-11-06

Figure 1–figure supplement 2

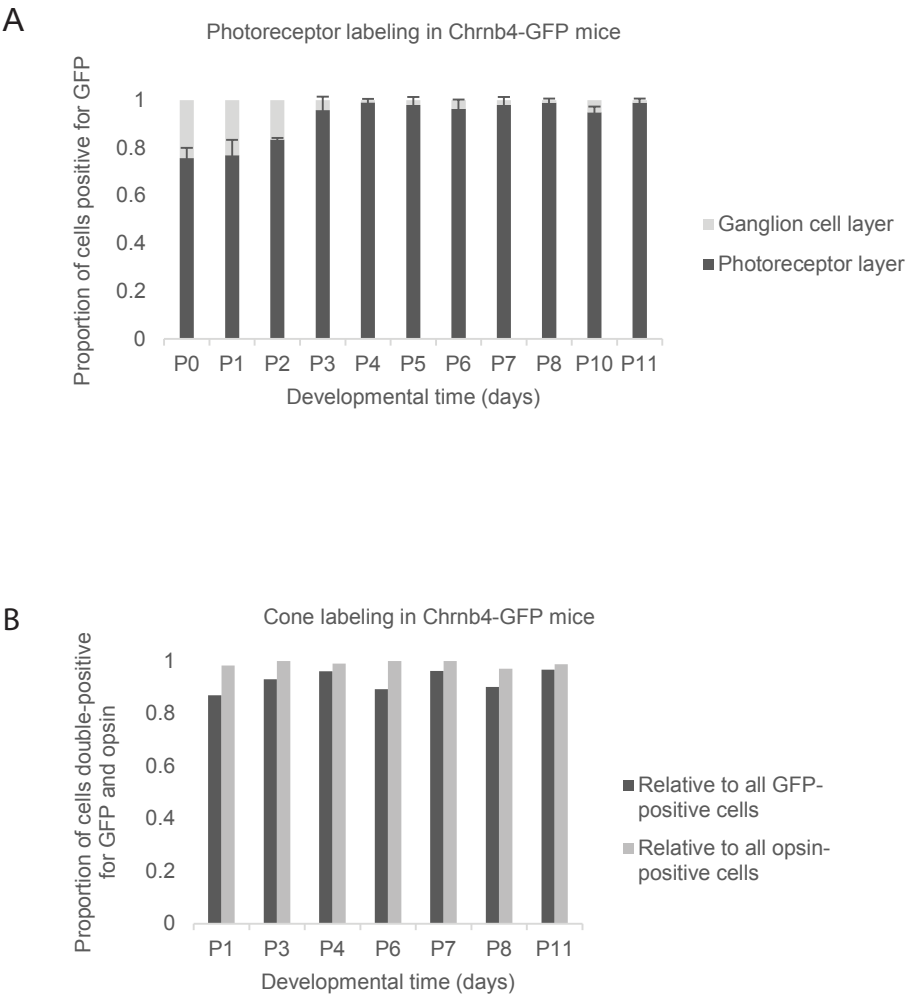

Supplement: supp [file elife-31437-supp-v1.zip › elife_poa_e31437_Figure_1_figure_supplement_2.pdf]

Figure 2—figure supplement 1

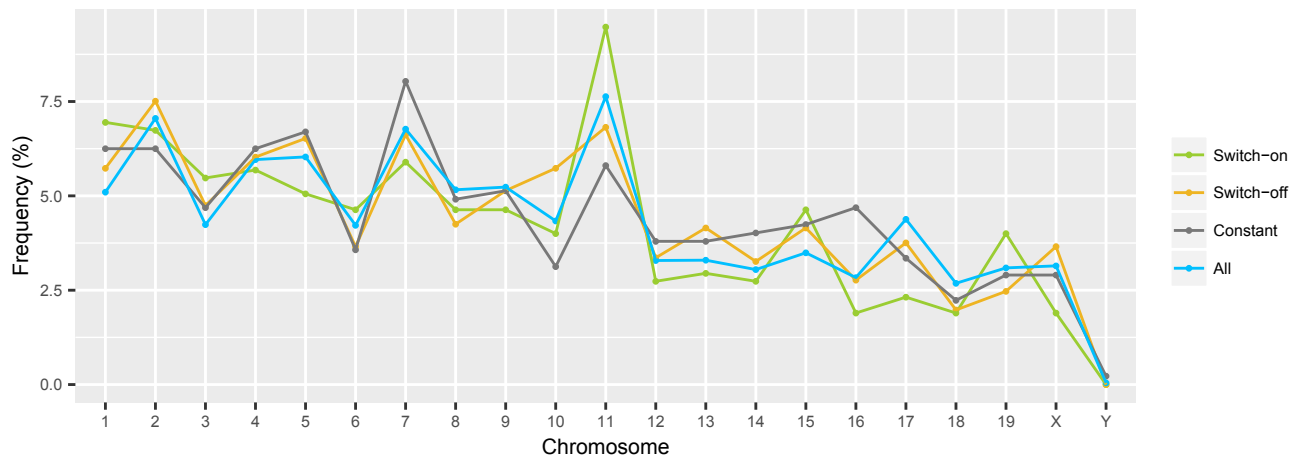

Supplement: supp [file elife-31437-supp-v1.zip › elife_poa_e31437_Figure_2_figure_supplement_1.pdf]

Figure 1–figure supplement 1

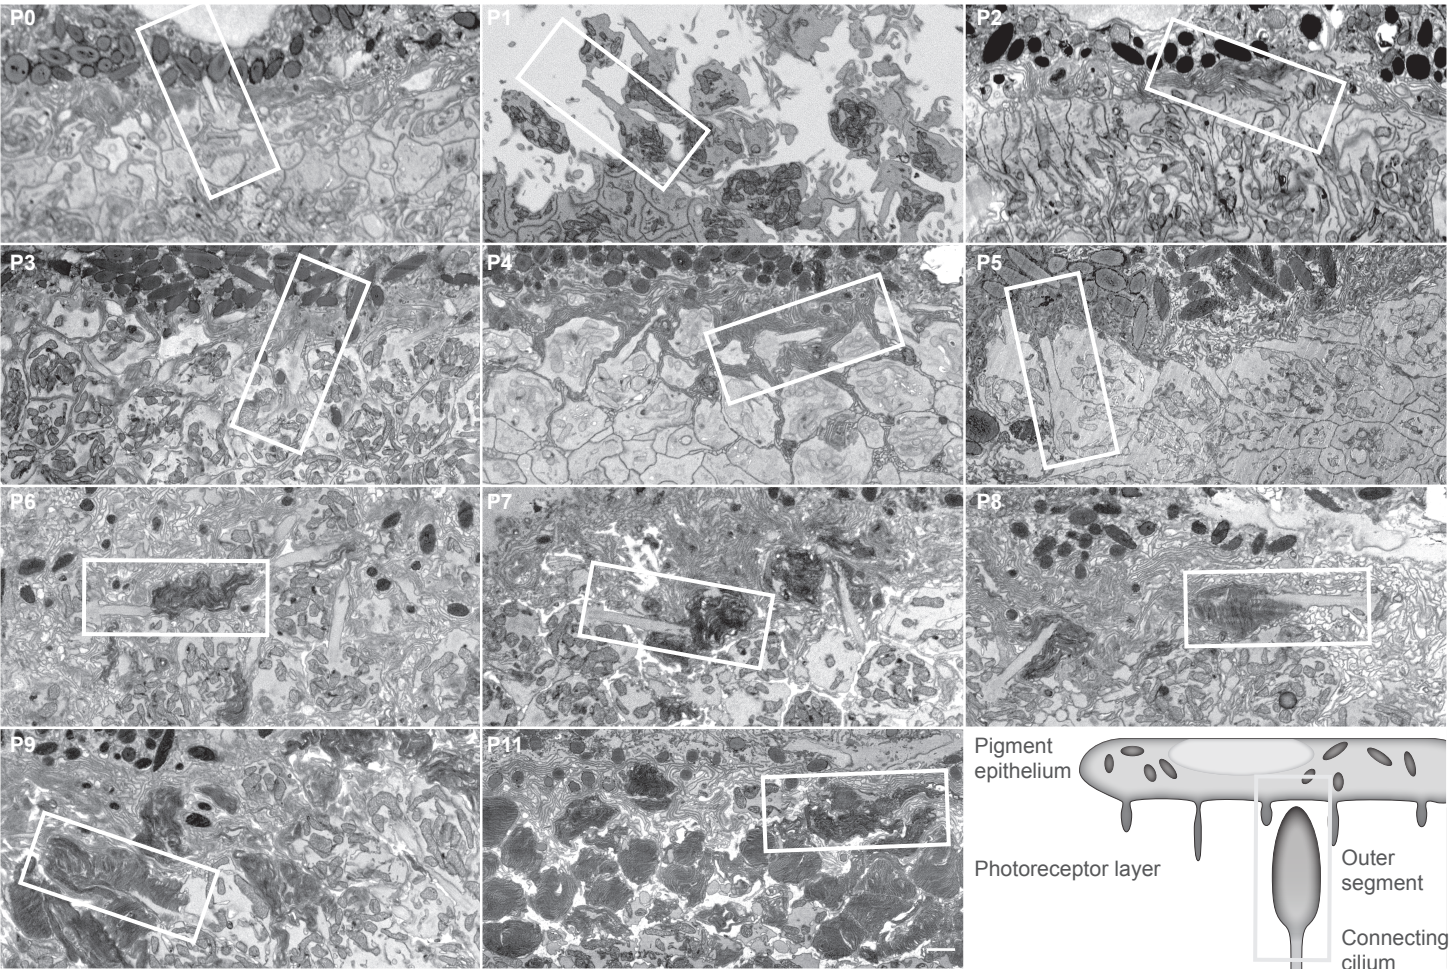

Supplement: supp [file elife-31437-supp-v1.zip › elife_poa_e31437_Figure_1_figure_supplement_1.pdf]

Figure 2–figure supplement 2

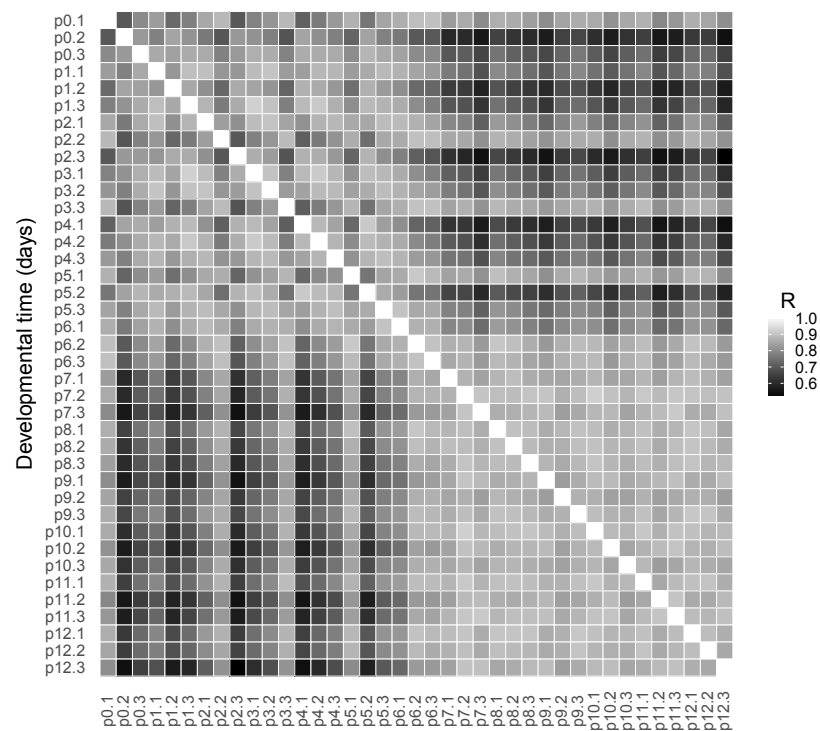

Supplement: supp [file elife-31437-supp-v1.zip › elife_poa_e31437_Figure_2_figure_supplement_2.pdf]

Figure 4–figure supplement 1

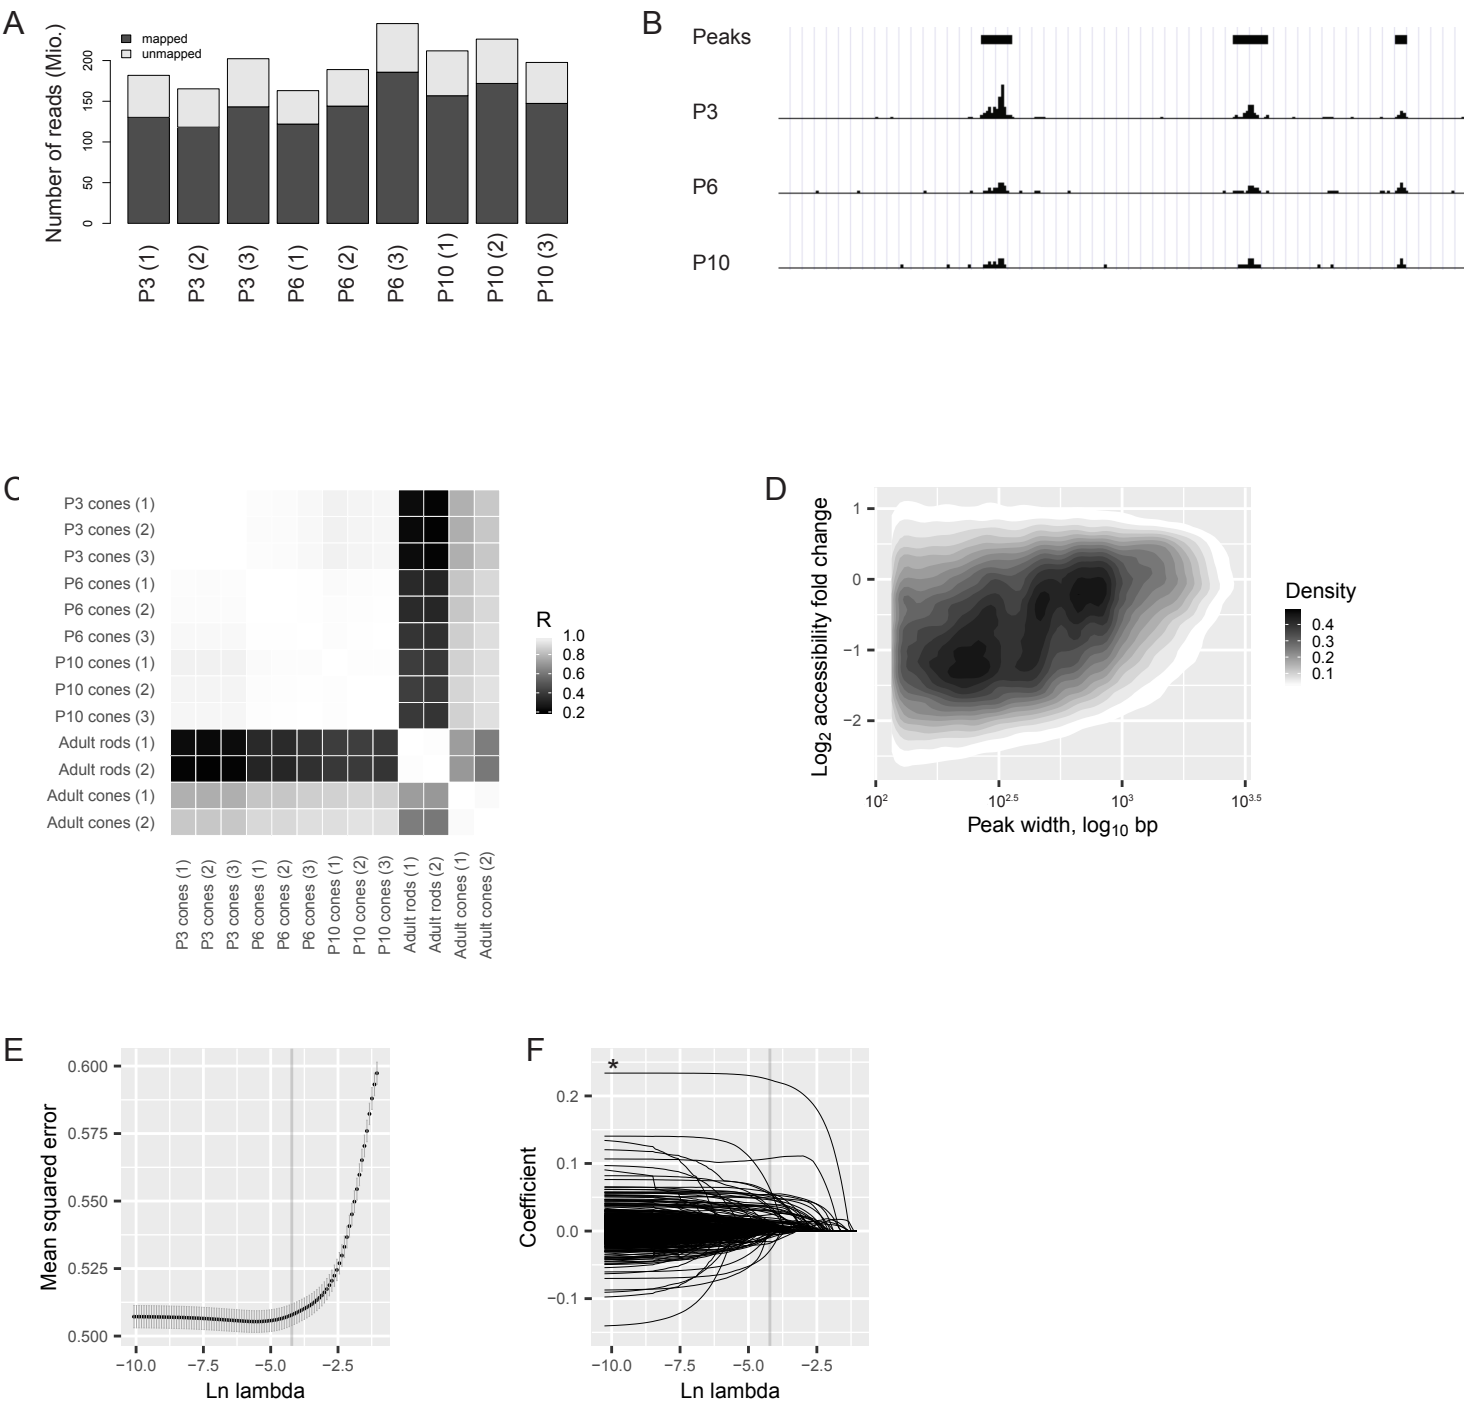

Supplement: supp [file elife-31437-supp-v1.zip › elife_poa_e31437_Figure_4_figure_supplement_1.pdf]

Figure 3–figure supplement 1

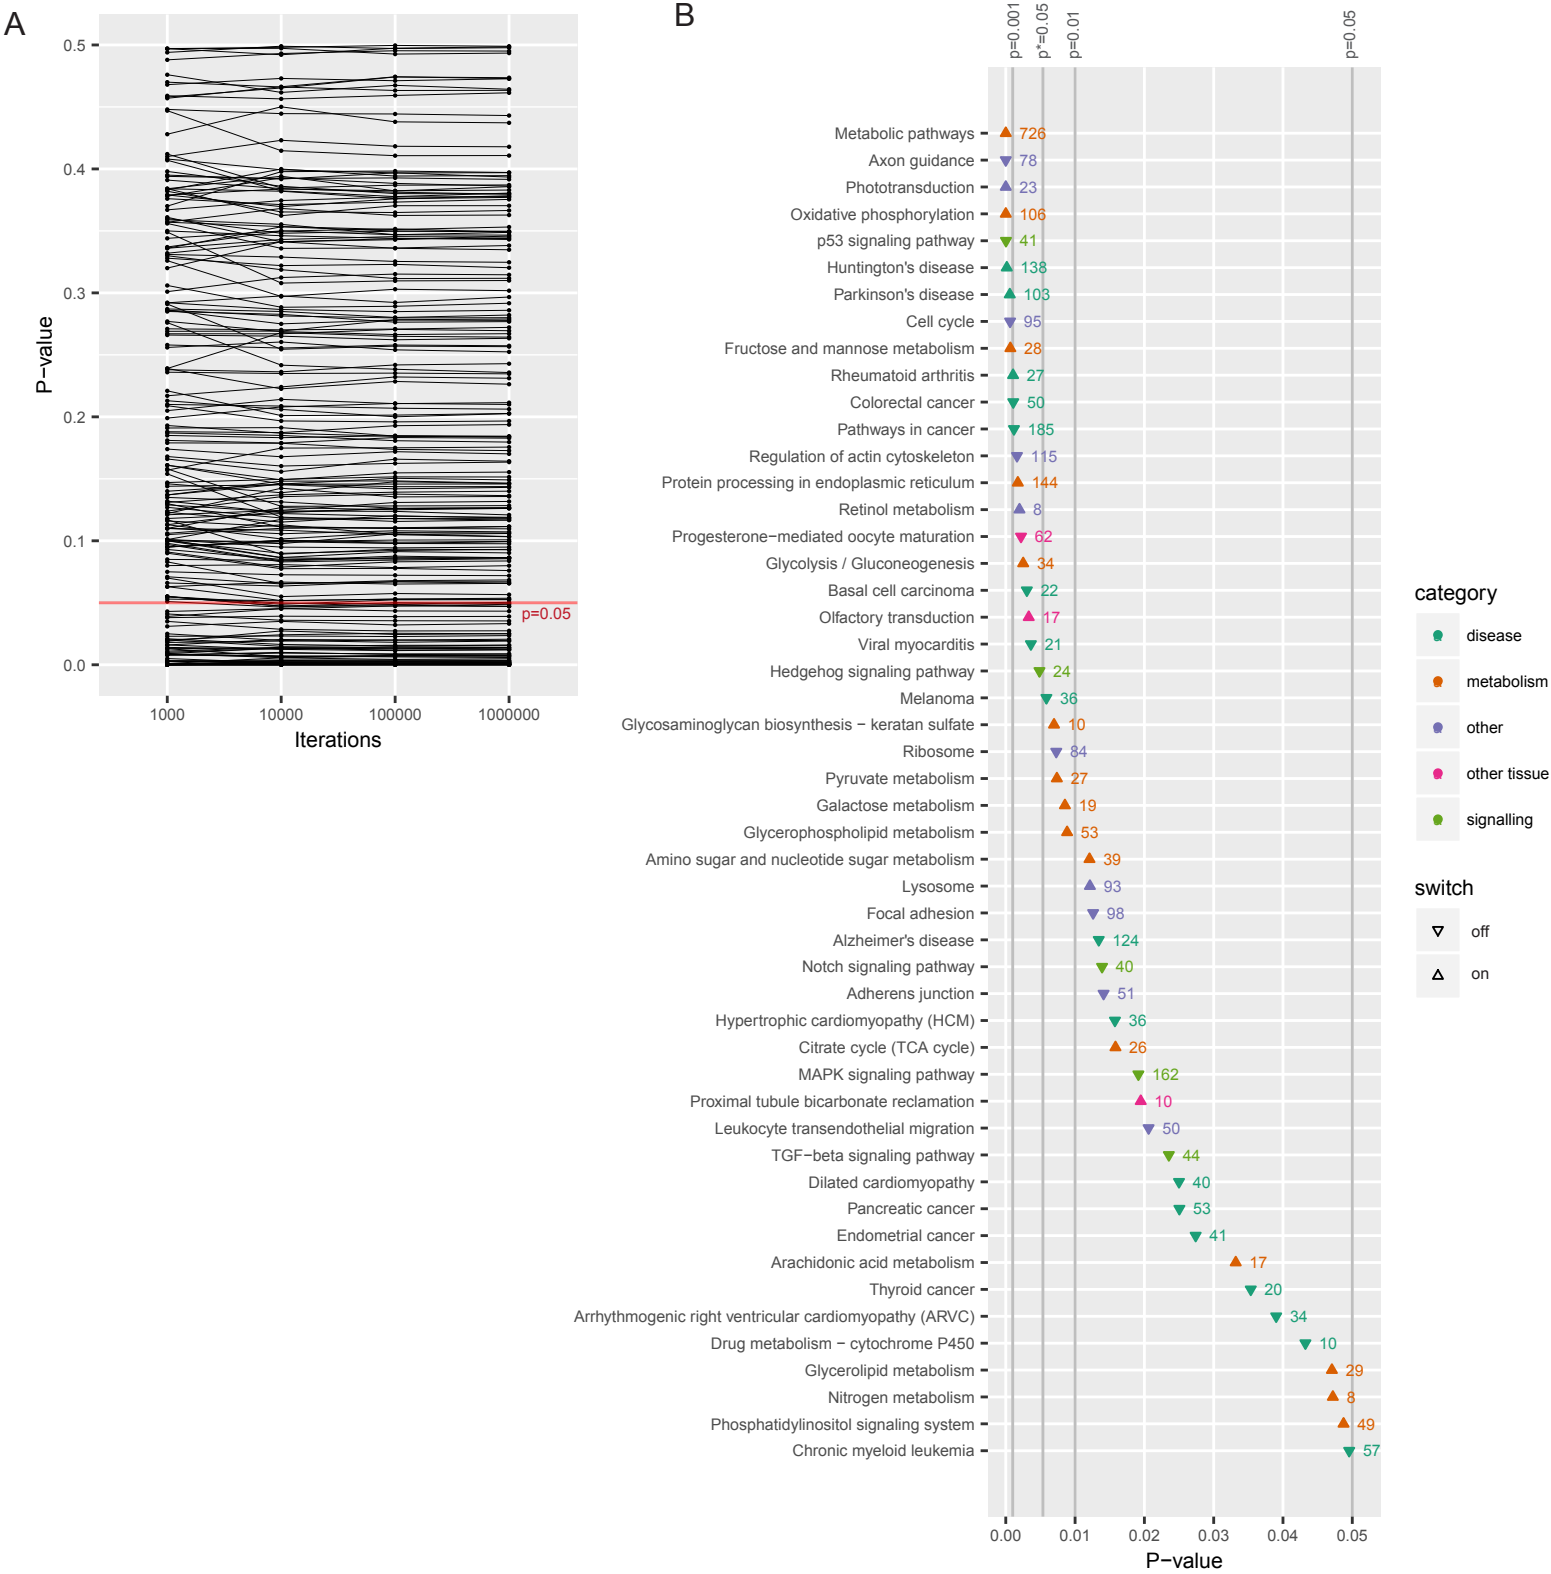

Supplement: supp [file elife-31437-supp-v1.zip › elife_poa_e31437_Figure_3_figure_supplement_1.pdf]
